# Supplementary material
Source: publisher figshare collection journal article supplement (https://geolsoc.figshare.com/ndownloader/files/6568986)
Supplement: Supplementary file 1 [file 6568986]

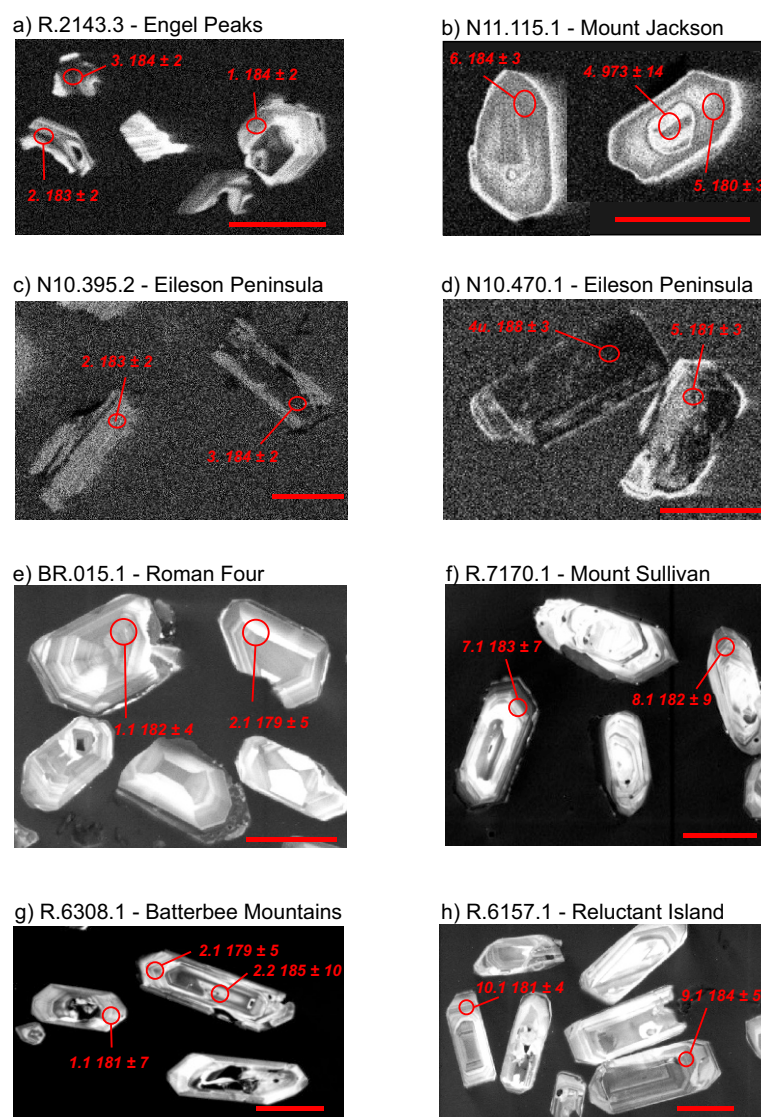

Supplementary Figure 1: Cathodoluminescence images of analysed zircon grains from sites on the Antarctic Peninsula. Circles indicate the position of analysis. (a) R.2143.3 Engel Peaks; (b) N11.115.1 Mount Jackson; (c) N10.395.2 Eileson Peninsula; (d) N10.470.1 Eileson Peninsula; (e) BR.015.1 Roman Four Promontory; (f) R.7170 Mount Sullivan; (g) R.6308.1 Batterbee Mountains; (h) R.6157.1 Reluctant Island.



## Supplementary text

### *Analytical methods: Sr and Nd isotope geochemistry*

Samples were weighed into Savillex teflon beakers and spiked with mixed  $^{149}\text{Sm}$ - $^{150}\text{Nd}$  and single  $^{84}\text{Sr}$  isotope tracers, prior to dissolution using  $\text{HF-HNO}_3\text{-HCl}$ . Ion exchange columns packed with Eichrom AG50x8 cation exchange resin were used to separate Sr and a bulk rare-earth element fraction. Sm and Nd were separated from the REE concentrate using EICHROM LN-SPEC columns. Sm fractions were loaded onto one side of an outgassed double Re filament assembly using dilute HCl, and analysed in a Thermo Scientific Triton mass spectrometer in static collection mode. Replicate analysis of the BCR-2 rock standard across the time of analysis gave a mean Sm concentration of  $6.34 \pm 0.06$  ppm (1-sigma, n=7). Nd fractions were also loaded onto one side of an outgassed double Re filament assembly using dilute HCl, and analysed in a Thermo Scientific Triton mass spectrometer in multi-dynamic mode. Nd data were normalised to  $^{146}\text{Nd}/^{144}\text{Nd} = 0.7219$ . Across the time of analysis, 19 analyses of the JND-i standard gave a value of  $0.512102 \pm 0.000005$  (10.4 ppm, 1-sigma). All other standard and sample data is quoted relative to a value of 0.512115 for this standard. Seven analyses of La Jolla gave  $0.511864 \pm 0.000006$  (11.5 ppm, 1-sigma). Replicate analysis of the BCR-2 rock standard gave a mean Nd concentration of  $28.1 \pm 0.3$  ppm and  $^{143}\text{Nd}/^{144}\text{Nd} = 0.512638 \pm 0.000006$  (11.9 ppm, 1-sigma, n=12). Sr fractions were loaded onto outgassed single Re filaments using a TaO activator solution, and analysed in a Thermo-Electron Triton mass spectrometer in multi-dynamic mode. Data were normalised to  $^{86}\text{Sr}/^{88}\text{Sr} = 0.1194$ . Across the time of analysis, 143 analyses of the NBS987 standard gave a value of  $0.710250 \pm 0.000006$  (9 ppm, 1-sigma). Replicate analyses of the BCR-2 rock standard run with the samples gave a mean Sr concentration of  $340.6 \pm 5.1$  ppm, and  $^{87}\text{Sr}/^{86}\text{Sr} = 0.705041 \pm 0.00023$  (33 ppm, 1-sigma, n=15). The calculated Rb/Sr (weight) ratio for BCR-2 is  $0.1379 \pm 0.0013$  (1-sigma).
